# Supplementary material for: Stability Study of Fosfomycin in Elastomeric Pumps at 4 °C and 34 °C: Technical Bases for a Continuous Infusion Use for Outpatient Parenteral Antibiotic Therapy
Source: MDPI journal article supplement (doi:10.3390/pharmaceutics15092347), 2023-09-19
Supplement: s1 [file s1]

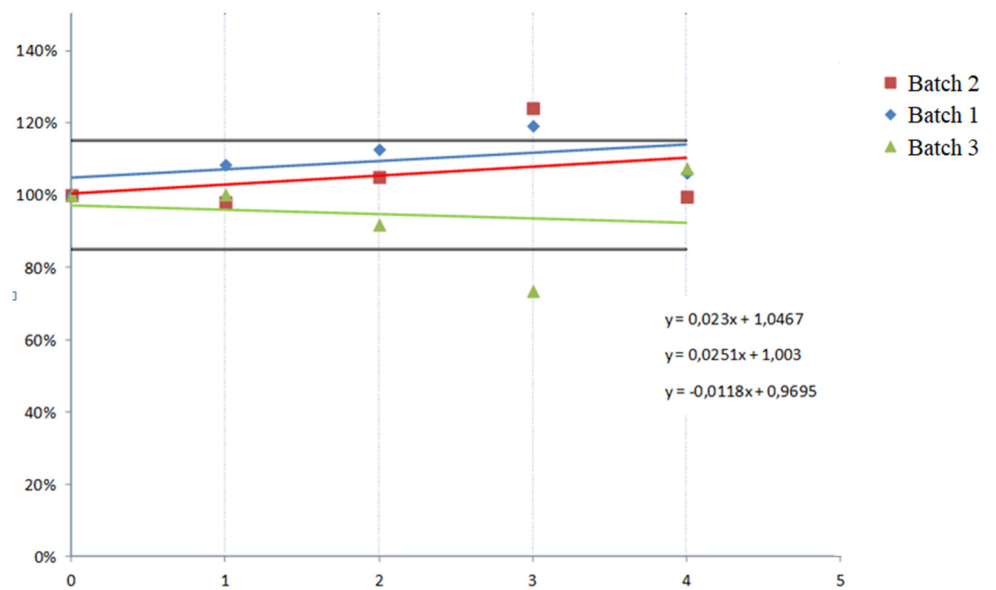

**Supplementary Figure S1.** Three lots of Fosfomycin (InfectoFos®) concentrations in an elastomeric infusion pump stored for 5 days at 4°C.

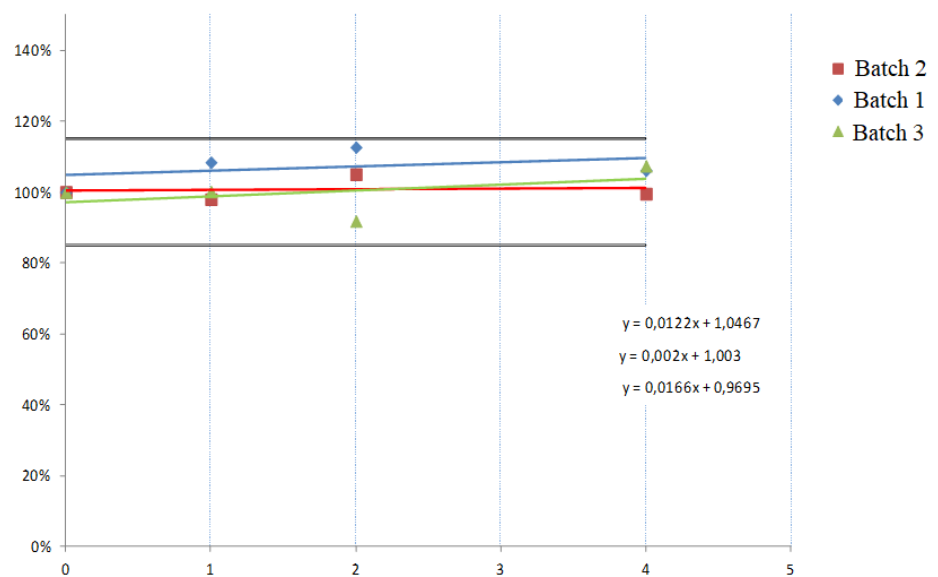

**Supplementary Figure S2.** Three lots of Fosfomycin (InfectoFos®) concentrations in an elastomeric infusion pump stored for 5 days at 4°C, except day 3.

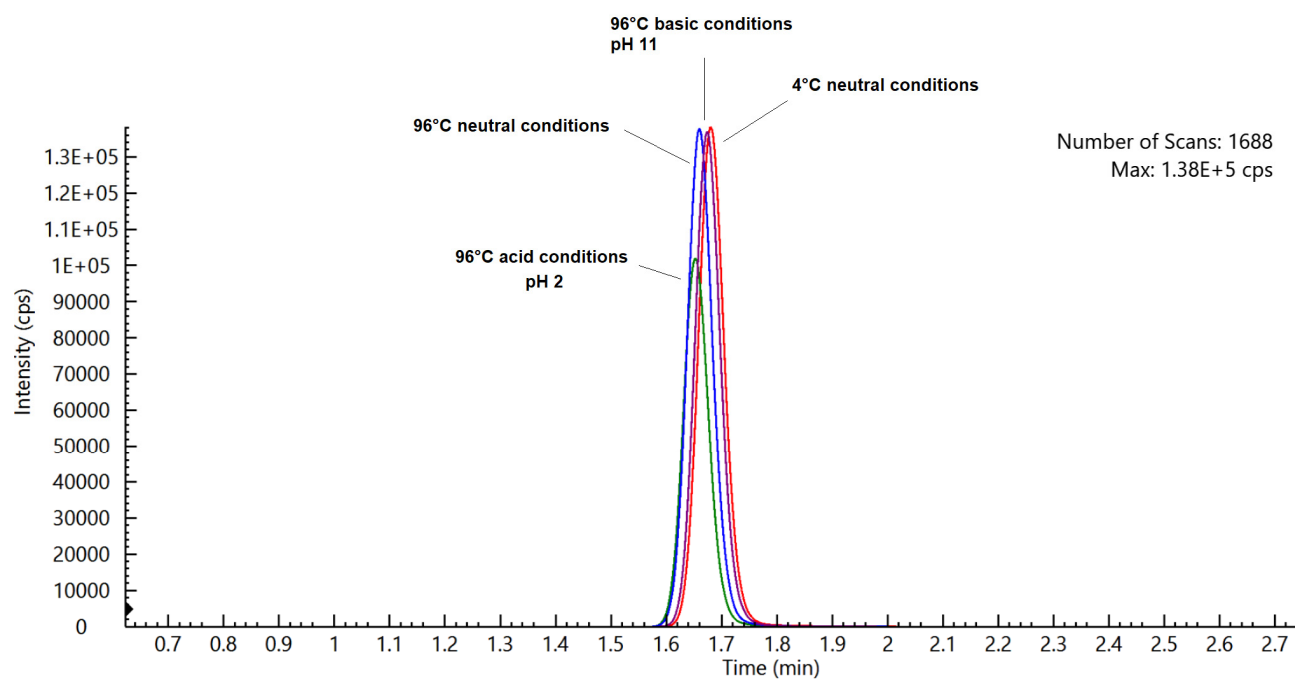

**Supplementary Figure S3.** Stress test evaluation after 24°C at 4 different conditions. As can be observed, FOS resulted stable at 96°C in neutral and basic conditions, while it showed 28% degradation at pH 2 (96°C).
